# Supplementary material for: Clumps of Mesenchymal Stem Cell/Extracellular Matrix Complexes Generated with Xeno-Free Conditions Facilitate Bone Regeneration via Direct and Indirect Osteogenesis
Source: PubMed Central journal article supplement (PMC6720767; doi:10.3390/ijms20163970), 2019-08-15
Supplement: ijms-20-03970-s001.pdf [file ijms-20-03970-s001.pdf]

**Table S1.** Antibodies for FACS.

| <b>Antigen</b> | <b>Antibody Type</b> | <b>Clone</b>   | <b>Conjugate</b> | <b>Source</b> | <b>Cat. No.</b> | <b>Dilution</b> |
|----------------|----------------------|----------------|------------------|---------------|-----------------|-----------------|
| CD105          | Mouse IgG1, k        | Mono (SN6)     | PE               | eBioscience   | 12-1057-41      | 1/100           |
| CD90           | Mouse IgG1, k        | Mono (5E10)    | PE               | BD Pharmingen | 561970          | 1/100           |
| CD73           | Mouse IgG1, k        | Mono (AD2)     | PE               | BD Pharmingen | 550257          | 1/100           |
| CD45           | Mouse IgG1, k        | Mono (HI30)    | PE               | BD Pharmingen | 555483          | 1/100           |
| CD34           | Mouse IgG1, k        | Mono (563)     | PE               | BD Pharmingen | 550781          | 1/100           |
| None           | Mouse IgG1, k        | Mono (MOPC-21) | PE               | BD Pharmingen | 559320          | 1/100           |

**Table S2.** Antibodies for immunostaining

| <b>Antigen</b>  | <b>Host Species</b> | <b>Clone</b>   | <b>Conjugate</b> | <b>Source</b> | <b>Cat. No.</b> | <b>Dilution</b> |
|-----------------|---------------------|----------------|------------------|---------------|-----------------|-----------------|
| Human vimentin  | Rabbit              | Mono (SP20)    | None             | abcam         | ab16700         | 1/100           |
| Human COL1      | Rabbit              | Mono (EPR7785) | None             | abcam         | ab138492        | 1/100           |
| Human OPN       | Goat                | Poly           | None             | R&D           | AF1433          | 1/100           |
| Human OCN       | Mouse               | Mono (OCG3)    | None             | abcam         | ab13420         | 1/100           |
| Mouse IgG(H+L)  | Goat                | Poly           | Alexa 594        | ThermoFisher  | A11032          | 1/100           |
| Rabbit IgG(H+L) | Goat                | Poly           | Alexa 488        | ThermoFisher  | A11008          | 1/100           |
| Goat IgG(H+L)   | Chicken             | Poly           | Alexa 594        | ThermoFisher  | A21468          | 1/100           |
